# Supplementary material
Source: Springer Nature journal article supplement (https://www.springermedizin.de/resource/supplementary/12894_2014_337_MOESM3_ESM.pdf/9513508)

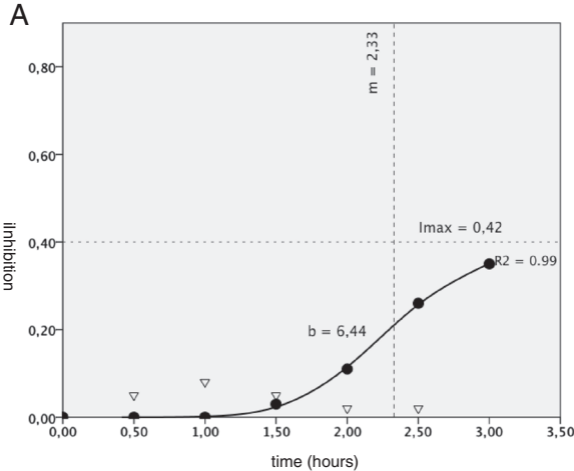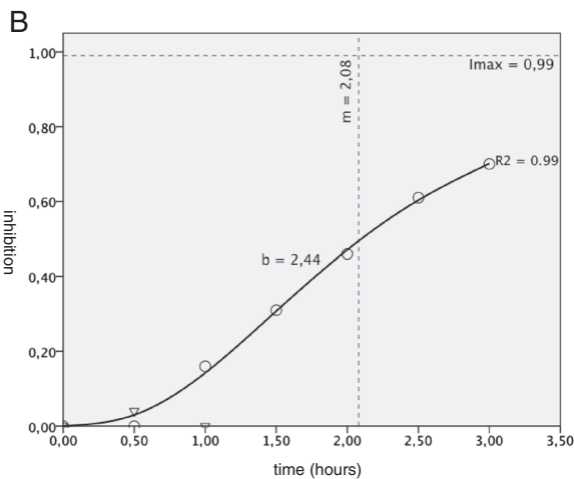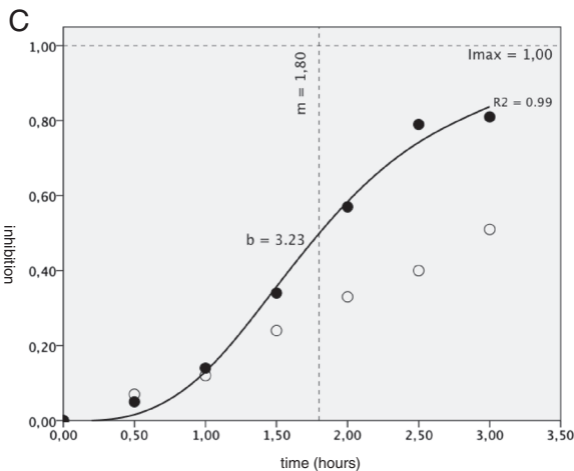

Supplement: MOESM3 [file 9513508]
